# Supplementary material
Source: publisher figshare collection journal article supplement (https://acs.figshare.com/ndownloader/files/3727360)

# Supporting Information

## **Hierarchical self-assembly of a renewable nano-sized pentacyclic dihydroxy-triterpenoid betulin yielding flower-like architectures**

Braja Gopal Bag\*<sup>[a]</sup> and Shib Shankar Dash<sup>[a]</sup>

<sup>[a]</sup>Department of Chemistry and Chemical Technology, Vidyasagar University, Midnapore, 721 102  
E-mail: braja@mail.vidyasagar.ac.in

| Table of Contents                                                                                              | Page |
|----------------------------------------------------------------------------------------------------------------|------|
| 1. Figure S1: Energy Minimized structure of Betulin <b>1</b>                                                   | S-3  |
| 2. Figure S2: FESEM images of <b>1</b> in <i>o</i> -xylene and <i>p</i> -xylene                                | S-3  |
| 3. Figure S3 and S4: FESEM images of <b>1</b> in <i>m</i> -xylene, mesitylene<br>and <i>o</i> -dichlorobenzene | S-4  |
| 4. Figure S5 and S6: FESEM images of <b>1</b> in 2-propanol and mesitylene                                     | S-5  |
| 5. Figure S7 and S8: OM images of <b>1</b> in <i>o</i> -xylene and <i>m</i> -xylene                            | S-6  |
| 6. Figure S9: OM images of <b>1</b> in <i>o</i> -dichlorobenzene and 2-propanol                                | S-7  |
| 7. Table S1: Wide angle X-ray diffraction data                                                                 | S-7  |
| 8. Figure S10: XRD pattern of neat powder and dried self-assemblies                                            | S-8  |
| 9. Figure S11: FTIR spectra of neat powder and dried self-assemblies                                           | S-9  |
| 10. Figure S12: POM images of betulin loaded with Rhodamine B                                                  | S-10 |
| 11. Figure S13: DLS spectra of <b>1</b> in different liquids                                                   | S-11 |
| 12. <sup>1</sup> H-NMR of Betulin <b>1</b>                                                                     | S-12 |
| 13. <sup>13</sup> C-NMR of Betulin <b>1</b>                                                                    | S-13 |

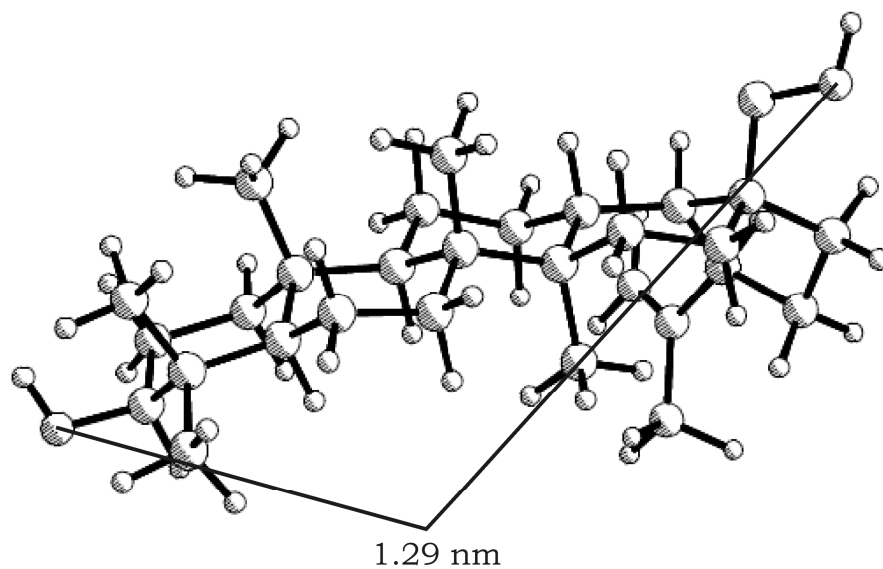

**Figure S1:** Energy minimized structure of betulin **1** using MMX force field as implemented in PCMODEL version 9.2 (serena software)<sup>®</sup>.

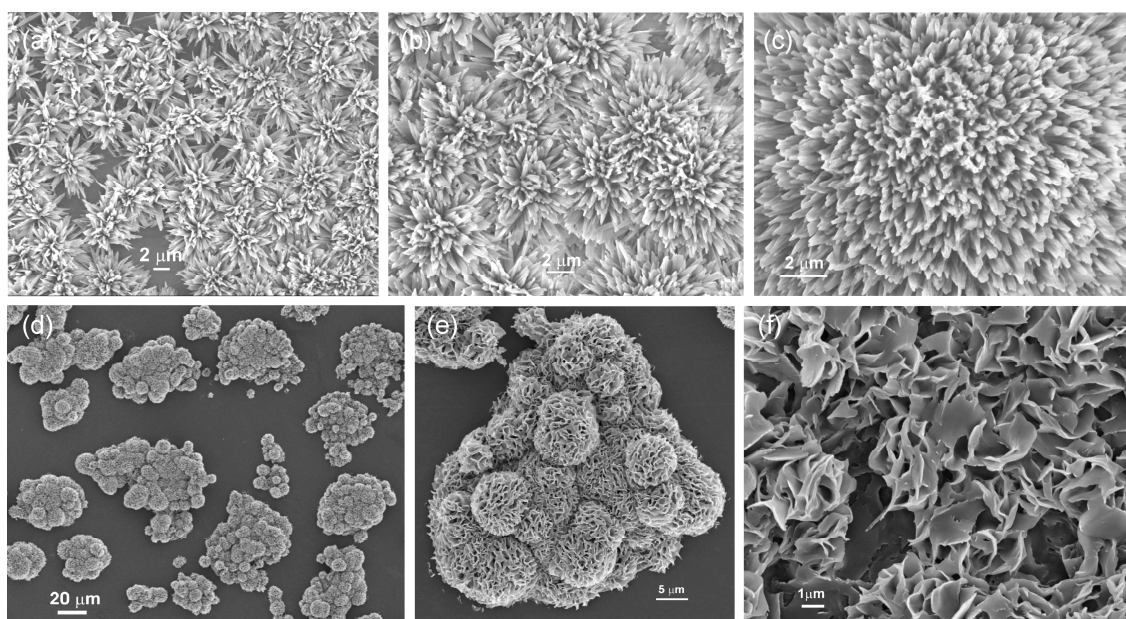

**Figure S2:** FESEM images of dried self assemblies of betulin: (a,b,c) prepared from *p*-xylene liquid (1% w/v) and (d,e,f) prepared from *o*-xylene liquid (1% w/v).

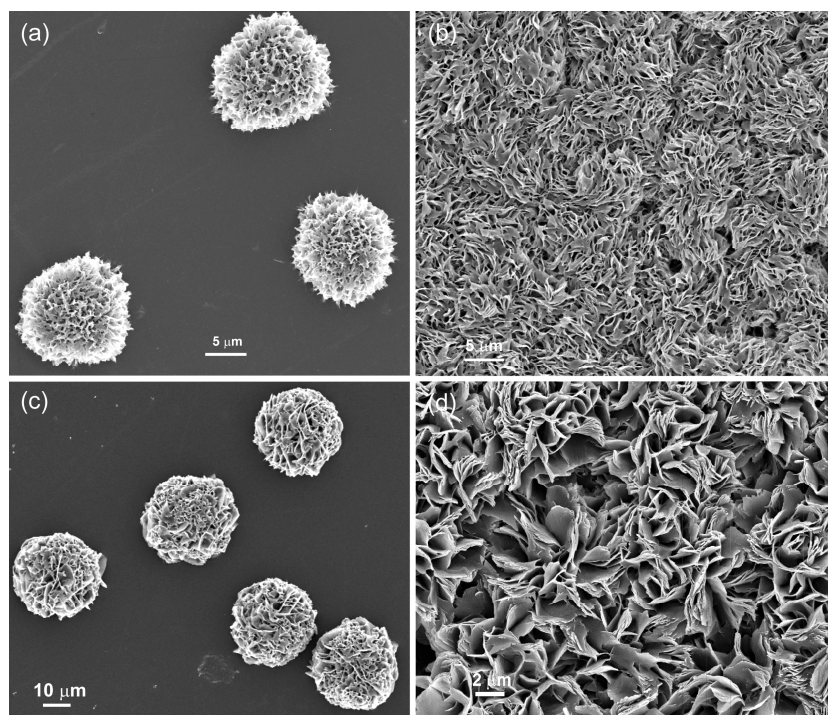

**Figure S3:** FESEM images of dried self assemblies of betulin: (a, b) prepared from *m*-xylene liquid (1% w/v) and (d, e, f) prepared from mesitylene liquid (1% w/v).

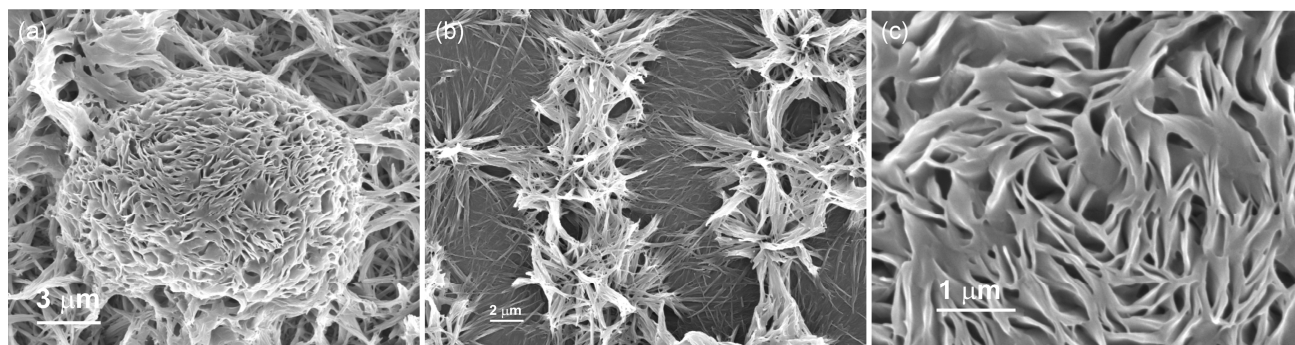

**Figure S4:** (a,b,c) FESEM images of dried self assemblies of betulin prepared from *o*-dichlorobenzene liquid (1% w/v).



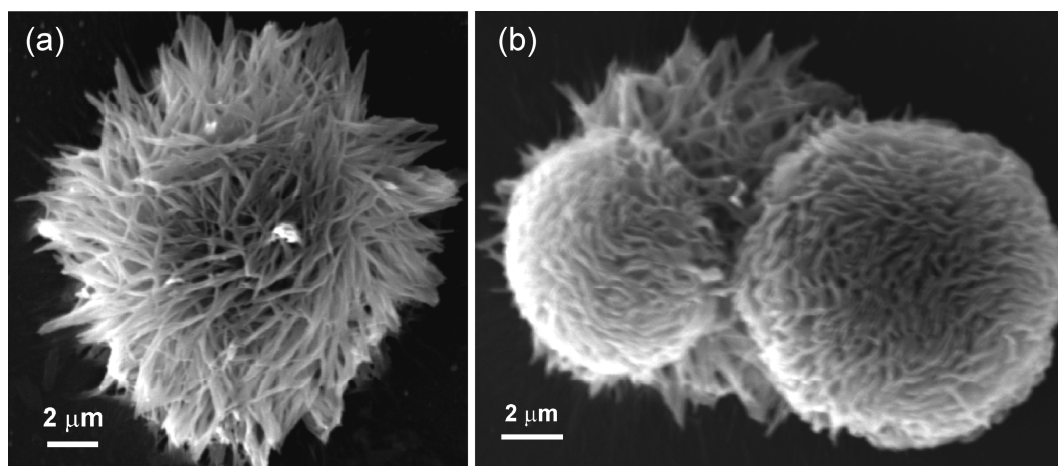

**Figure S5:** (a,b) SEM images of dried self-assemblies of betulin prepared from isopropanol liquid (1% w/v).

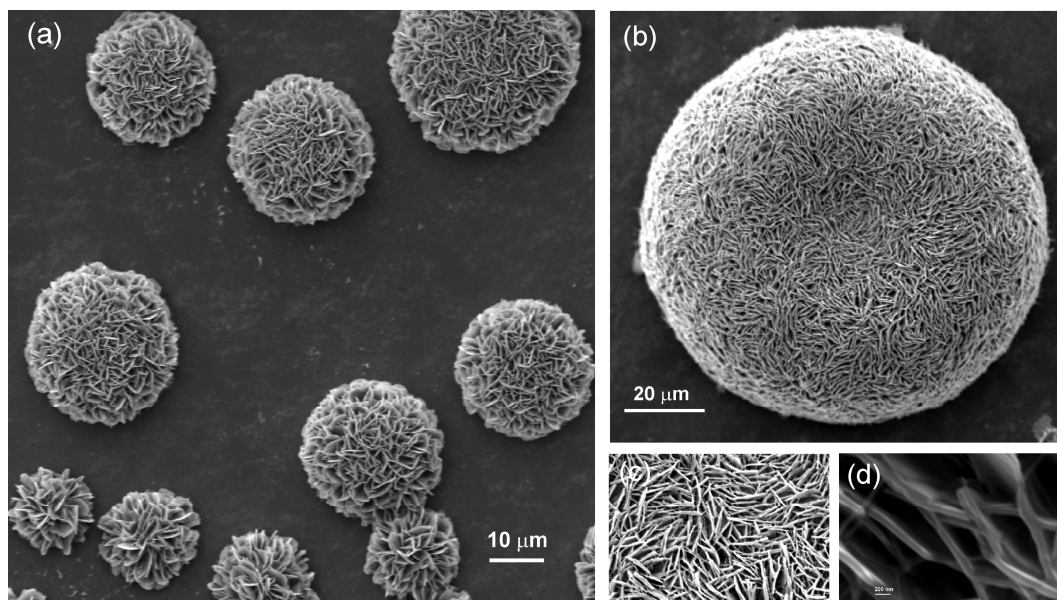

**Figure S6:** (a-d) SEM images of dried self-assemblies of betulin prepared from mesitylene liquid (2 % w/v).

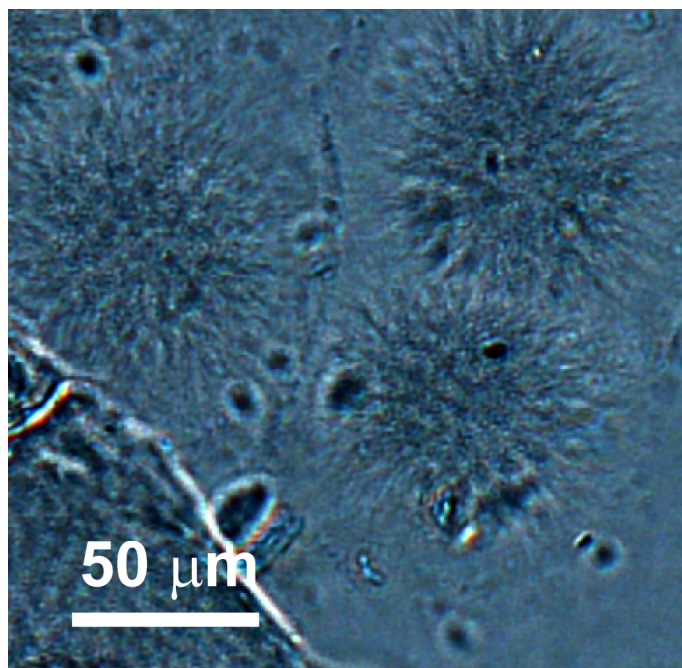

**Figure S7:** OM images of betulin in *o*-xylene in native state

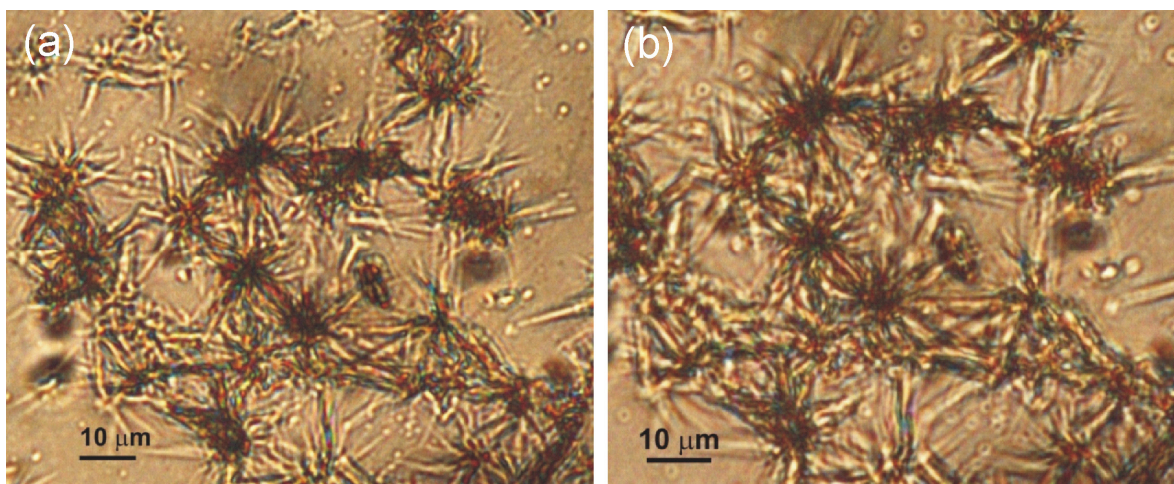

**Figure S8:** (a, b) Optical microscopy images of **1** in *m*-xylene.

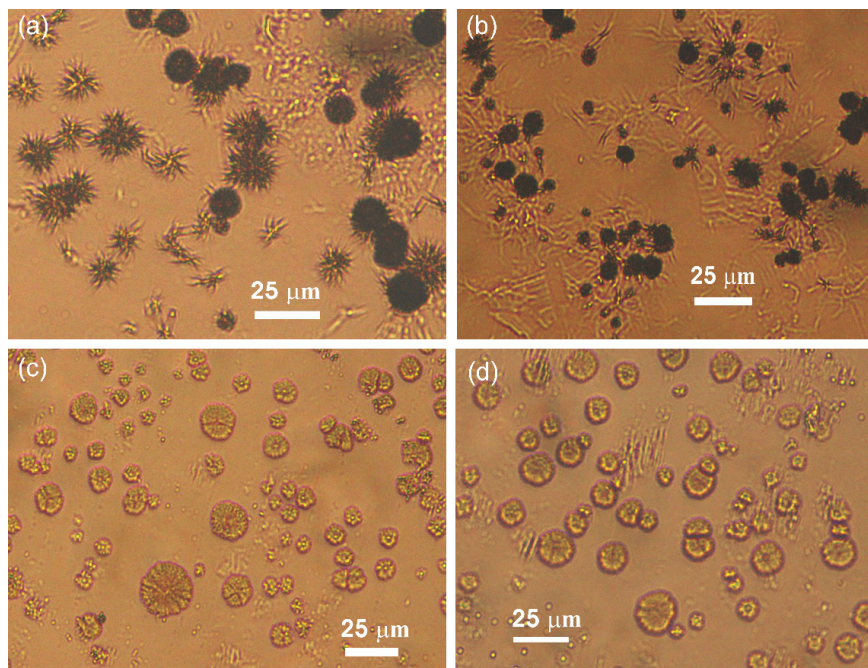

**Figure S9:** Optical microscopy images of dried self assemblies of **1**: (a, b) in *o*-dichlorobenzene (1 % w/v); (c, d) in 2-propanol (1 % w/v).

**Table S1** Wide angle X-ray diffraction data of neat powder and dried self assemblies under different condition

| Sample                                                                  | d (Å)                                                                                                       |
|-------------------------------------------------------------------------|-------------------------------------------------------------------------------------------------------------|
| Neat powder                                                             | 1.17, 0.973, 0.709, 0.638, 0.615, 0.587, 0.536                                                              |
| Dried self-assemblies of <b>1</b> prepared from <i>o</i> -xylene liquid | 1.19, 0.943, 0.876, 0.820, 0.614, 0.583, 0.562, 0.533, 0.489, 0.472, 0.442, 0.417, 0.398, 0.232             |
| Dried self-assemblies of <b>1</b> prepared from <i>m</i> -xylene liquid | 1.24, 1.07, 0.984, 0.866, 0.827, 0.774, 0.674, 0.639, 0.616, 0.580, 0.555, 0.518, 0.468, 0.433, 0.425, 0.41 |
| Dried self-assemblies of <b>1</b> prepared from <i>p</i> -xylene liquid | 1.23, 1.09, 0.996, 0.861, 0.830, 0.773, 0.674, 0.614, 0.547, 0.468, 0.41                                    |
| Dried self-assemblies of <b>1</b> prepared from mesitylene liquid       | 1.16, 1.09, 0.965, 0.846, 0.735, 0.704, 0.668, 0.634, 0.614, 0.582, 0.544, 0.532, 0.418                     |

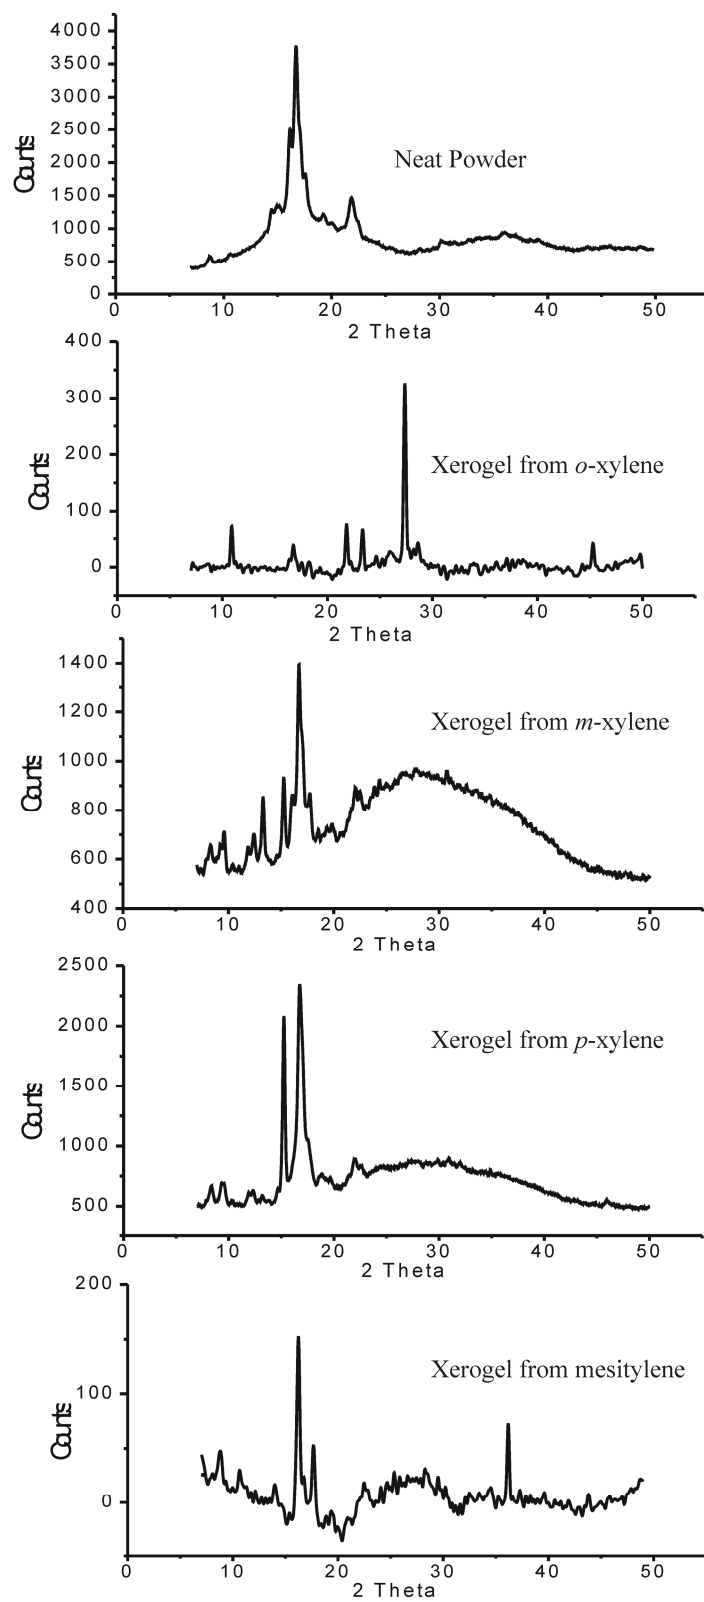

**Figure S10:** XRD pattern of neat powder and dried self assemblies prepared from different organic liquids (as indicated).

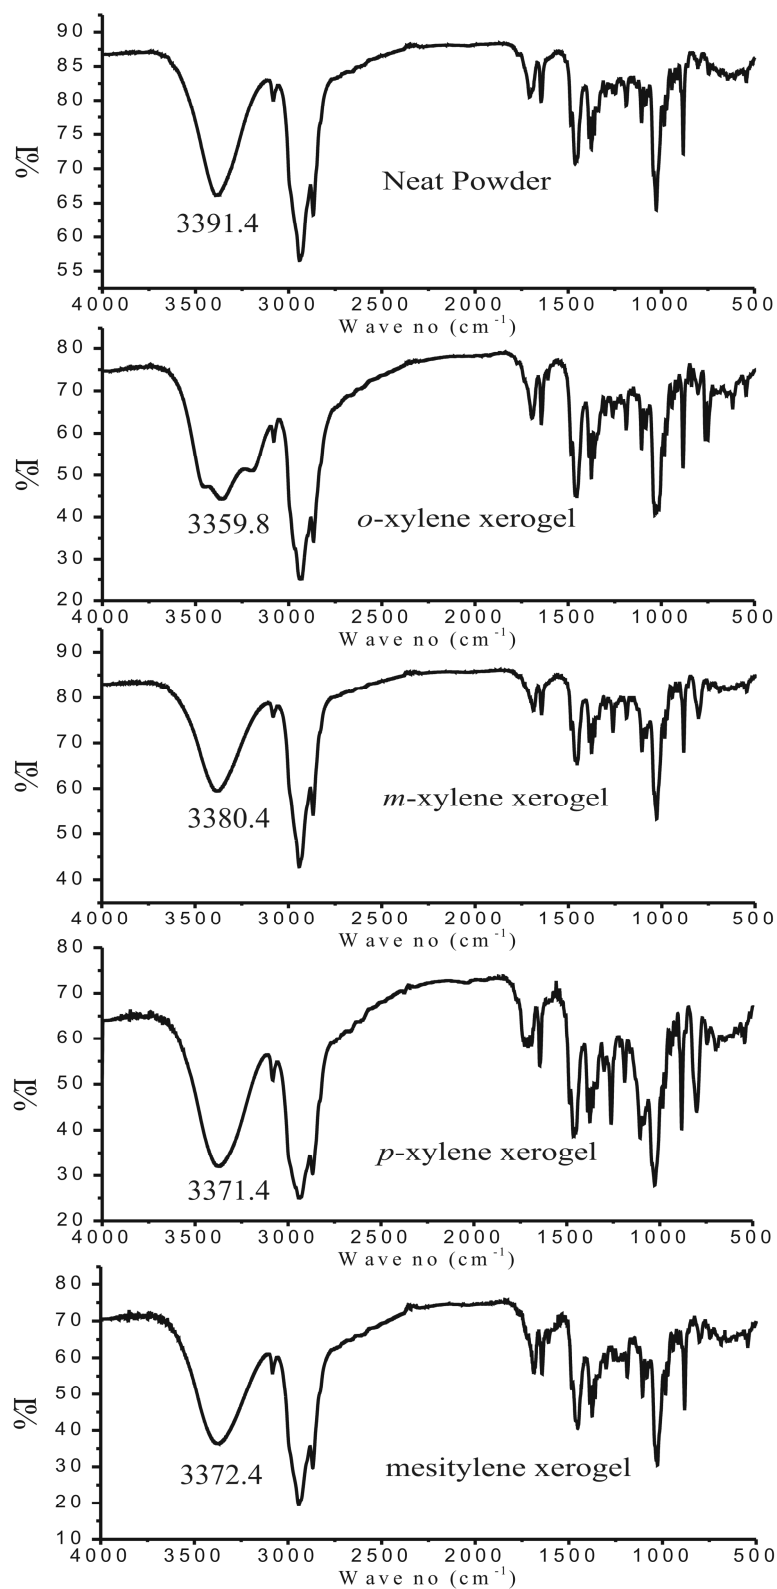

**Figure S11:** FTIR spectra of neat powder of betulin and xerogels obtained from different organic liquids (as indicated).



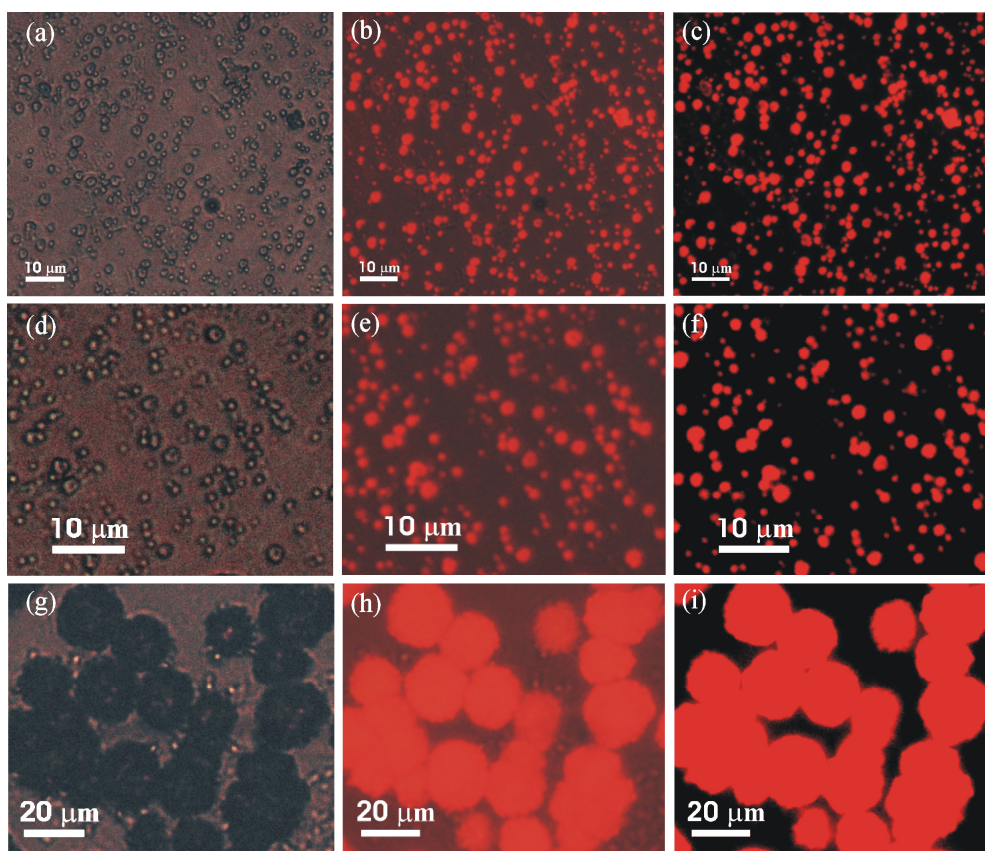

**Figure S12:** POM images of betulin loaded with rhodamine B in isopropanol (0.42 mM): (a, d, g) under normal light, (b, e, h) overlay images and (c, f, i) fluorescence images.

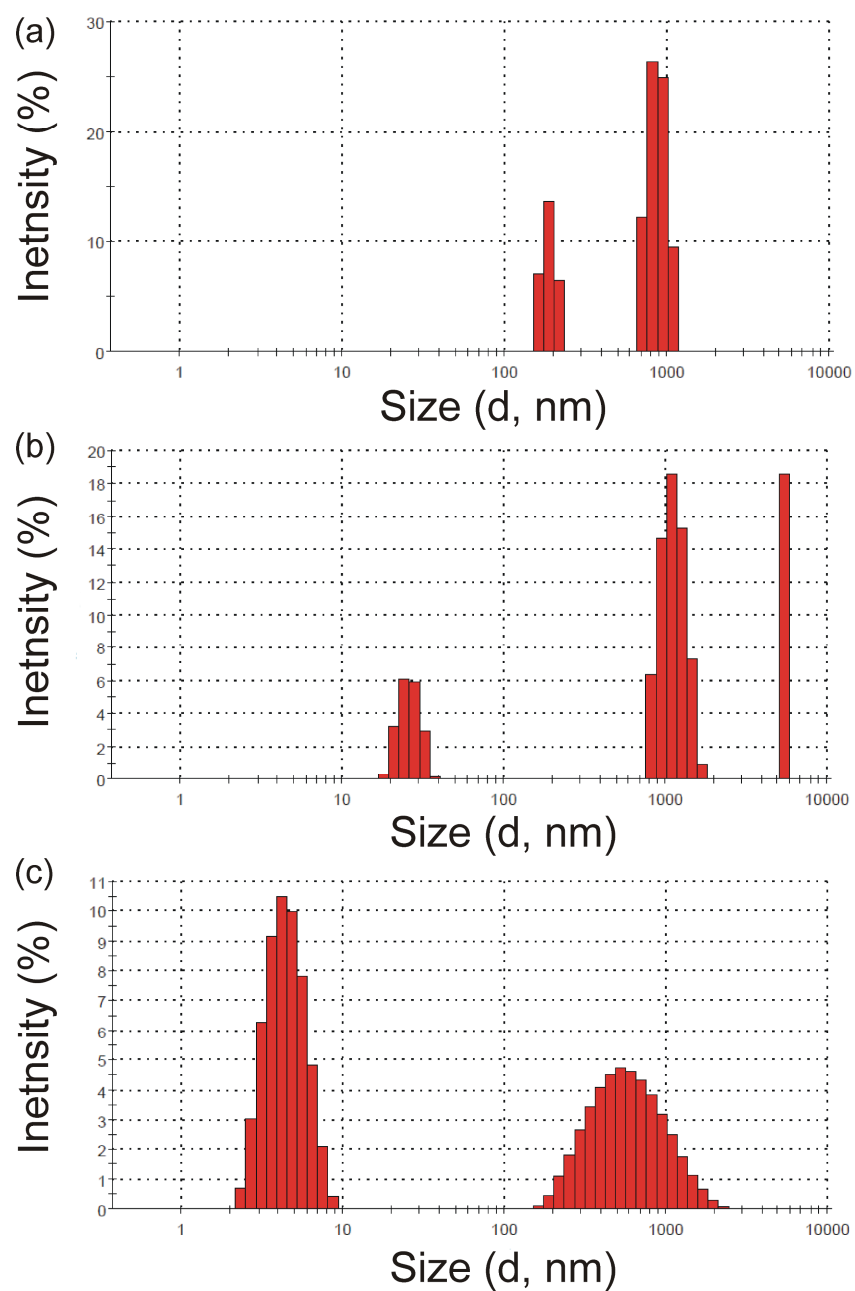

**Figure S13:** Statistical graph of **1** in (a) mesitylene (0.5 % w/v), *m*-xylene (0.25 % w/v) and *o*-xylene (0.25 % w/v) liquids.

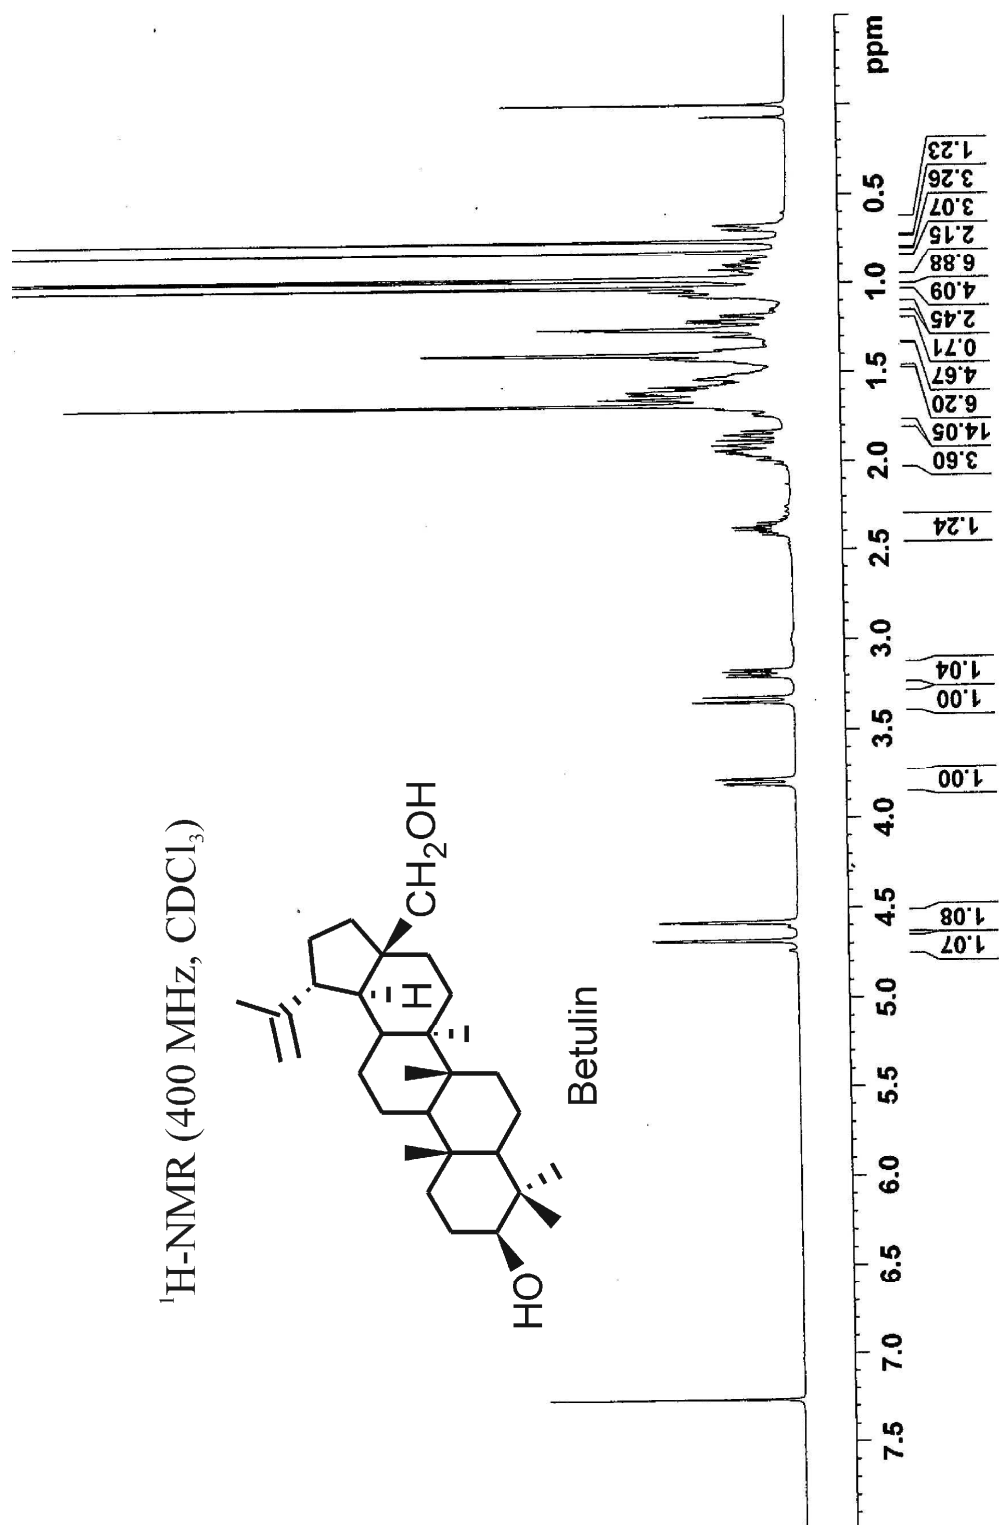



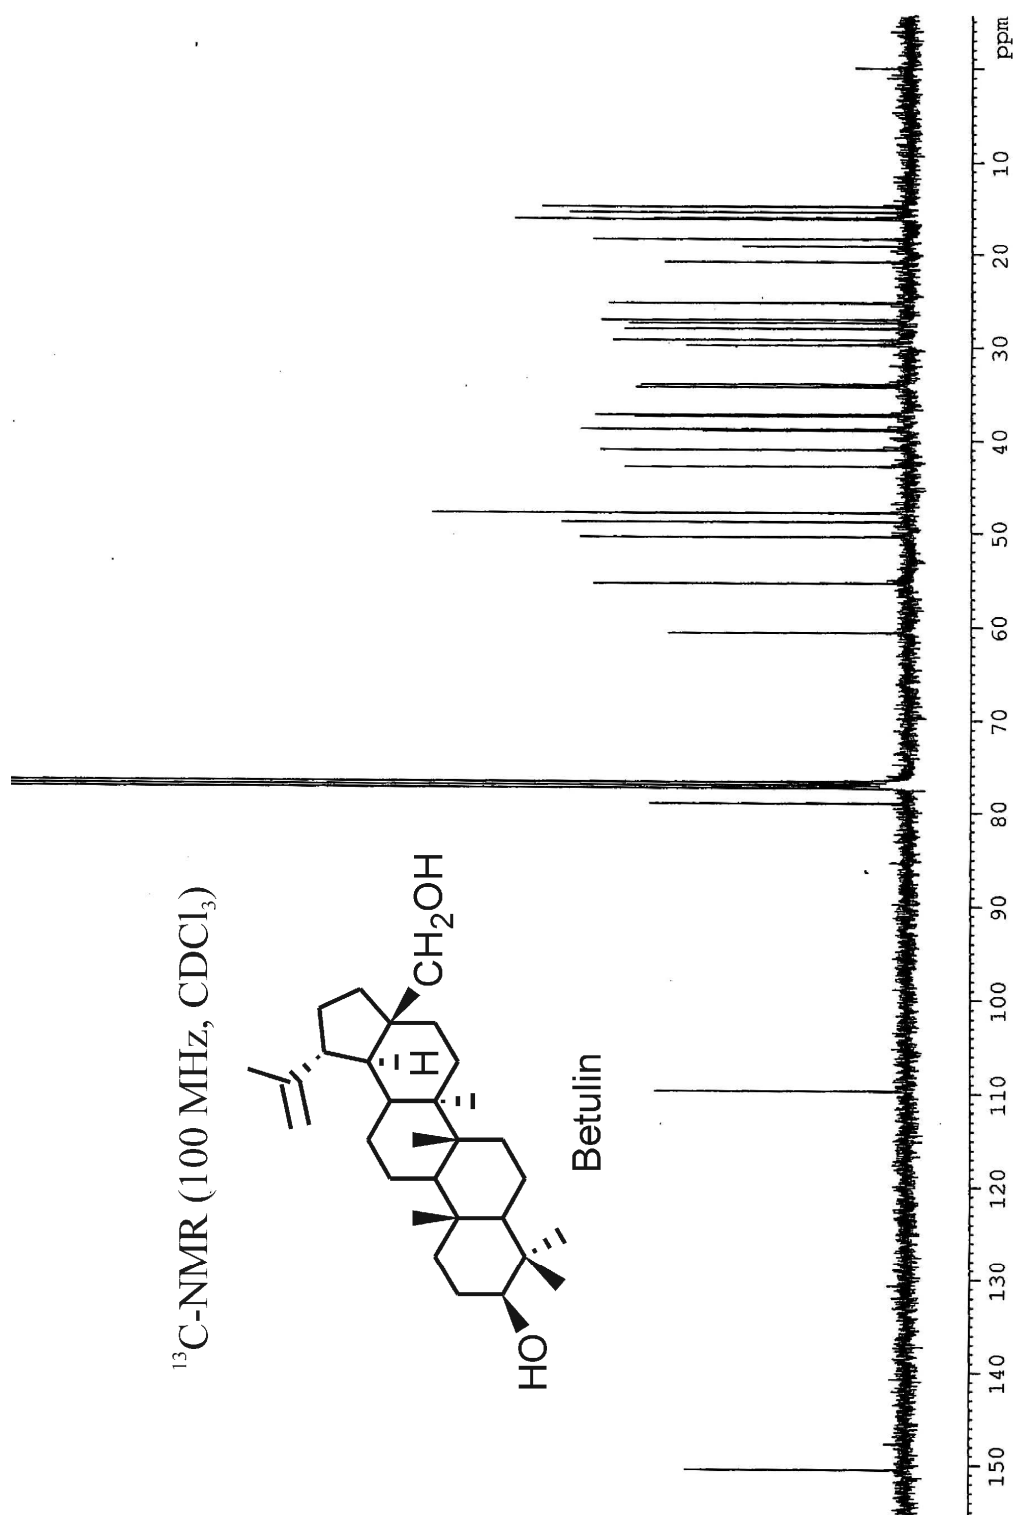

Supplement: Supplementary file 1 [file 3727360]
